# Supplementary material
Source: PubMed Central journal article supplement (PMC3215033)
Supplement: 1110724108_pnas.201110724SI.pdf [file 1110724108_pnas.201110724SI.pdf]

# Supporting Information

Weatherall et al. 10.1073/pnas.1110724108

## SI Experimental Procedures

**Electrophysiology.** Expressed SK currents recorded in the excised outside-out patch configurations were evoked in symmetrical high (~160 mM) K<sup>+</sup> conditions, using an internal solution that contained 1 μM free Ca<sup>2+</sup>. Due to low expression rates, whole-cell recordings were made of rSK1\* channel subunits expressed in tsA201 cells. Pipettes were fabricated from KG-33 glass (Friedrich & Dimmock) and filled with an internal solution of composition: KAsp (97 mM) and KCl (20 mM) or KCl (117 mM), Hepes (10 mM), EGTA (10 mM), Na<sub>2</sub>ATP (1.5 mM), CaCl<sub>2</sub> (9.65 mM; calculated free [Ca<sup>2+</sup>]<sub>i</sub>, 1 μM), and MgCl<sub>2</sub> (2.34 mM; calculated free [Mg<sup>2+</sup>]<sub>i</sub>, 1 mM), pH 7.4, with ~40 mM KOH. Cells were bathed in a control external solution that consisted of KAsp (97 mM) and KCl (20 mM) or KCl (127 mM), Hepes (10 mM), EGTA (10 mM), CaCl<sub>2</sub> (6.19 mM; calculated free [Ca<sup>2+</sup>]<sub>i</sub>, 60 nM), and MgCl<sub>2</sub> (1.44 mM; calculated free [Mg<sup>2+</sup>]<sub>i</sub>, 1 mM), pH 7.4, with ~40 mM KOH. For concentration response curves, solutions were rapidly exchanged using an RSC200 rapid switcher (Biologic). Expressed SK currents were evoked by a 1-s voltage ramp from -100 to +100 mV.

For concentration-inhibition relationships, data points representing current block were fit with a variable slope Hill equation in the form

$$I/I_{\text{cont}} = A_{\text{min}} + \left( \frac{A_{\text{max}} - A_{\text{min}}}{1 + 10^{(\text{Log } IC_{50} - X) \times n_h}} \right), \quad \text{[S1]}$$

where  $I_{\text{cont}}$  is the amplitude of current at -60 mV in the absence of drug,  $I$  is the amplitude of current observed at a given concentration of blocker  $[X]$ , expressed in logarithmic units,  $A_{\text{min}}$  is  $I_{\text{min}}/I_{\text{cont}}$ ,  $A_{\text{max}}$  is  $I_{\text{max}}/I_{\text{cont}}$ ,  $IC_{50}$  is the concentration of blocker

that blocks 50% of the sensitive current, and  $n_h$  is the Hill coefficient.

Where data were best fitted by the sum of two Hill equations, the equation

$$I/I_{\text{cont}} = A_{\text{min}} + \left( \frac{A_{\text{frac}} - A_{\text{min}}}{1 + 10^{(\text{Log } IC_{50,a} - X) \times n_{h,a}}} \right) + \left( \frac{A_{\text{max}} - A_{\text{frac}}}{1 + 10^{(\text{Log } IC_{50,b} - X) \times n_{h,b}}} \right) \quad \text{[S2]}$$

was used, where  $A_{\text{frac}}$  is the amplitude of the current at the maximum of the high-sensitivity component ( $I_{\text{frac}}/I_{\text{cont}}$ ),  $IC_{50,a}$  is the  $IC_{50}$  of the high-sensitivity component,  $n_{h,a}$  is the Hill coefficient of the high-sensitivity component,  $IC_{50,b}$  is the  $IC_{50}$  of the low-sensitivity component, and  $n_{h,b}$  is the Hill coefficient of the low-sensitivity component.

**Radioligand Binding.** Membranes were prepared for binding experiments as described previously (1). Saturation binding of <sup>125</sup>I-apamin (Perkin-Elmer Life Sciences) was carried out as described previously (1). Data were fit with a Hill equation of the form

$$\text{Bound/Total bound} = \frac{[\text{apamin}]^{n_h}}{([\text{apamin}] + K_D)^{n_h}} \quad \text{[S3]}$$

with  $K_D$  being the dissociation constant of the peptide and  $n_h$  the Hill coefficient. For all experiments, a 1/ $Y$  (where  $Y$  = bound/total bound) weighting procedure was used, which gave more weight to the smaller values of radioactivity (i.e., those that are close to the  $K_D$ ).

1. Lamy C, et al. (2010) Allosteric block of K<sub>Ca</sub>2 channels by apamin. *J Biol Chem* 285: 27067–27077.
